# Supplementary material
Source: HighWire-hosted journal article supplement (https://innovations.bmj.com/highwire/filestream/138270/field_highwire_adjunct_files/3/bmjinnov-2019-000347supp004_data_supplement.pdf)

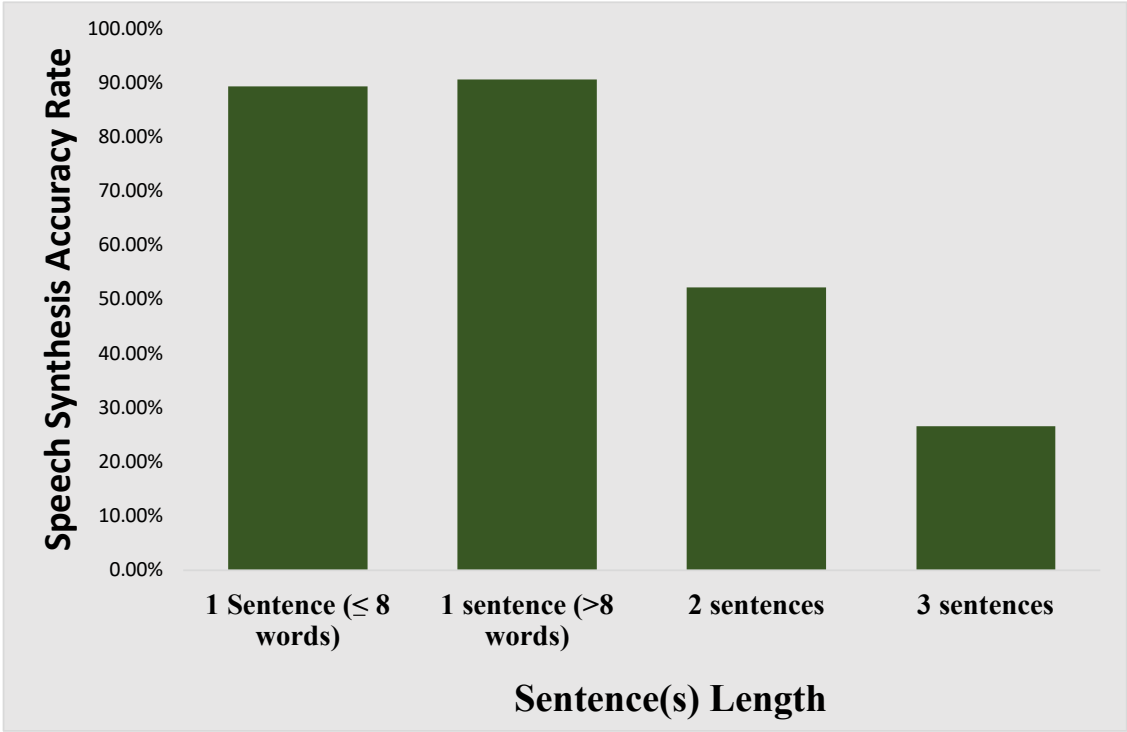

Supplement: bmjinnov-2019-000347supp004_data_supplement.pdf [file bmjinnov-2019-000347supp004_data_supplement.pdf]
